# Supplementary material for: Metabolomic-driven prediction of the mutational status of healthy individuals with a family history of hereditary breast and ovarian cancer syndrome: The HRRmet study
Source: Research Square preprint supplement (doi:10.21203/rs.3.rs-7297956/v1), 2025-09-01
Supplement: Supplementary file 1 [file 5f41af5a7ed29f933bf9fa61.xlsx]

## Sheet: Supplementary Table S1
Metabolites		Global						BRCA1						BRCA2						PALB2						ATM						CHEK2						RAD51						High penetrance
		Carriers (n=130)		Non- carriers (n=130)		P-value		Carriers (n=32)		Non- carriers (n=39)		P-value		Carriers (n=52)		Non- carriers (n=58)		P-value		Carriers (n=13)		Non- carriers (n=10)		P-value		Carriers (n=15)		Non- carriers (n=11)		P-value		Carriers (n=9)		Non- carriers (n=8)		P-value		Carriers (n=9)		Non- carriers (n=4)		P-value		Carriers (n=97)		Non- carriers (n=107)		P-value
		Mean	SD	Mean	SD			Mean	SD	Mean	SD			Mean	SD	Mean	SD			Mean	SD	Mean	SD			Mean	SD	Mean	SD			Mean	SD	Mean	SD			Mean	SD	Mean	SD			Mean	SD	Mean	SD
(1R,9S)-10-(Cyclopropylmethyl)-12-ethyl-4-hydroxy-13-methyl-10-azatricyclo[7.3.1.02,7]trideca-2(7),3,5-trien-8-one																										3631.98	3711.36	9604.94	8313.33	0.0149935								2572.59	1730.76	10141.6	4478.28	0.00559441
[3-[2-Aminoethoxy(hydroxy)phosphoryl]oxy-2-hydroxypropyl] hexadecanoate
1,4-Butanediphosphonic acid								197872	151861	136680	135430	0.0408595
17-Ethynyl-16-fluoroestradiol																										17697.3	10501	6896.5	4162.67	0.000822401								16135.3	6640.79	7582.29	4065.25	0.0335664
1-Methyl-5-(4-benzoyl)pyrrole-2-acetic acid 2-(theophylline-7-yl)ethyl ester		43984.4	87716.9	35123.3	67947.9	0.033291								49799.6	78020	43540.4	86767.7	0.0132994																										50135.3	99823.1	36664.9	73021.8	0.0180131
2-(2-Chlorophenyl)ethylbiguanide								68644	58243.9	38712.3	38038.3	0.0296285																																55512.1	53693.7	37770.8	34761	0.0275342
2,2,2-Trifluoroacetophenone														150985	101590	115417	78901.9	0.0374795																										156657	109713	123405	79761.1	0.0299605
2,6-Ditert-butyl-4-[3-(3,5-ditert-butyl-4-hydroxyphenoxy)propoxy]phenol																																13824.2	4194.12	25542.8	13006	0.00551213
2-Chloro-4-[(dimethylcarbamoyl)amino]benzoic acid														128140	85079.7	101659	98456.3	0.02865																										121194	79634.5	103088	91528.5	0.0297813
3-Acetamidophenol
3-Butylphthalic acid		141811	160555	132702	195819	0.0258026																										166750	151930	38341.6	54975.2	0.00789798
4-Alanylaminoantipyrine								275527	215821	188946	187102	0.0374908
4-Methoxy-N,N-dimethylaniline		78129.6	57952.6	94419.7	65512.3	0.0348229								65603.3	47657.5	98181	70935.7	0.01939																										77090.8	57357.5	95812.1	65082.2	0.029603
Acetyl-N-formyl-5-methoxykynurenamine		585860	944426	426698	668099	0.0161435		614209	604576	310386	451390	0.00365458																																526131	641904	395497	620945	0.0100433
Benzamide, 4-chloro-N-(2-(4-morpholinyl)ethyl)-, N-oxide																																						257614	204120	57766	32962.3	0.0111888
Bergamotin																										20053.7	17368.9	6920.35	7561.52	0.00445888
CAR 10:0														1.03674e+06	658681	837646	753186	0.0452126																										972189	629661	966283	1.77597e+06	0.0270369
CAR 12:1								86841.3	48396.8	74633	70404.7	0.027065
CAR 14:0;O														19629.2	13584.7	14663.1	12087.2	0.0380315								14035.3	17091.6	20334.4	10067.2	0.0414462														19135.9	14532.2	13444.3	10858.1	0.00376371
CAR 14:2																										75714.7	69330.4	149913	151039	0.0362271
CAR 2:0																																												711220	704860	521888	688398	0.0399521
CAR 3:0		2.41131e+06	2.18105e+06	1.85658e+06	1.9103e+06	0.0193003		2.98875e+06	2.3349e+06	1.87314e+06	2.10636e+06	0.0225004																																2.36372e+06	2.05001e+06	1.84168e+06	1.99633e+06	0.0254349
CAR 4:0		2.32531e+06	2.43092e+06	1.70193e+06	1.85572e+06	0.0148776		3.06598e+06	3.43649e+06	1.69298e+06	1.97751e+06	0.0143392																																2.41028e+06	2.60411e+06	1.64858e+06	1.84362e+06	0.0204574
CAR 5:0		1.01711e+06	924228	890330	1.01722e+06	0.0302736		1.24024e+06	1.16641e+06	802947	949410	0.0296285																																951011	870375	843307	981716	0.0379293
CAR 6:0								371461	337423	228426	207125	0.010217																																362111	327660	349770	905471	0.0200732
CAR14:1;OH
Carnitine		2.13868e+06	2.6776e+06	1.53422e+06	1.87455e+06	0.0371582																																3.20676e+06	4.42067e+06	709137	102249	0.0335664
Cytosine-5-carboxylic acid
Diisopropylethylamine																																												393642	1.6788e+06	240662	147023	0.0463164
DL-Indole-3-lactic acid A								755797	536854	580341	669943	0.0444775																																674101	537897	598008	669604	0.0489819
DL-Indole-3-lactic acid B		288871	210400	228860	172966	0.0115349		303290	191978	213516	168887	0.0232119																																288944	212880	213478	148131	0.010252
DL-Valine-4-antipyrineamide								145767	87296.1	98777.2	60118.5	0.0246927
D-Valine, methyl ester		231803	175851	189836	169530	0.0286744		255193	209923	153430	142918	0.027065																																236915	181318	182193	158674	0.0226163
Fluoro-beta-alanine																																						46444.5	21907.9	130206	61828.4	0.0111888
Guanidinosuccinic acid		192627	199773	160846	209137	0.033703		211162	216956	116897	172230	0.0153185
L-Isopulegol		37921.5	30177	42801.3	23996.4	0.00726591		29354.8	12559.9	43046	20058.6	0.00110695								35540.5	25049.9	59171.1	31371.2	0.0213624																				38238	31660.1	42986.4	23795.1	0.0177833
LPC 18:1 A								2.38114e+06	1.18281e+06	1.42371e+06	774289	0.000239074
LPC 18:1 C								176043	154518	112562	97243.6	0.0105762
LPE 18:0																																												21111.2	14105.4	18636	16740.6	0.0460567
LPE 19:0								194764	84140.6	154149	100580	0.0129725
L-Phenylalanine, methyl ester		2.41087e+07	1.88549e+07	1.95149e+07	1.59496e+07	0.0402637																																						2.43494e+07	1.93297e+07	1.85944e+07	1.58625e+07	0.0275342
Methyl 6,7-dimethoxy-4-ethyl-beta-carboline-3-carboxylate
N-(2-Hydroxyethyl)valine		1.17801e+07	6.29813e+06	1.02335e+07	6.24735e+06	0.0265805		1.2231e+07	6.52226e+06	8.99634e+06	5.0405e+06	0.0296285																				1.32705e+07	8.71342e+06	6.77069e+06	3.61832e+06	0.0464007
N,N-Diethyl-6-methyl-[1,2,4]triazolo[1,5-a]pyrimidin-5-amine														89322.9	222535	50791.8	133507	0.0414906
N-Lactoylleucine								4.53428e+06	4.32778e+06	2.33148e+06	2.27681e+06	0.00597788
PC O-18:0 (PC O-16:0/2:0) - PAF		920065	663877	756775	530567	0.0323466		924773	527652	659111	427071	0.0374908
PG 34:1 (PG 16:1_18:0)																										22736.8	23084.7	6072.8	6287.82	0.0204189
Phenylalanine		3.10837e+06	2.21698e+06	2.58613e+06	1.9701e+06	0.0435865																																						3.08924e+06	2.29109e+06	2.46118e+06	1.95898e+06	0.0345481
Phenyl-Alanine								77348.3	137199	16091.5	31340.4	0.0105762
Phenylethylmalonamide																																												199340	195914	144892	122625	0.0447766
Tetrahydroxybutylimidazole																																						64648.9	178767	258926	312731	0.0195804
Theobromine																																154395	191732	668566	764907	0.00156314
trans-4-Aminocyclohexanecarboxylic acid								6.23881e+06	8.04477e+06	3.08797e+06	4.53871e+06	0.0174523								2.33437e+06	2.61734e+06	6.68856e+06	5.72075e+06	0.03
Triethylene glycol dimethacrylate		17607.1	10952.8	13516.9	8230.23	0.00250669		19579.2	9234.69	13351.3	8809.19	0.00169715								19789.8	8702.13	13331.5	5371.33	0.0358441																				17584.4	10980.7	13720.2	8300.52	0.0104646
Tryptophan								1.79222e+07	1.22078e+07	1.29192e+07	1.05986e+07	0.0333647
Tryptophan betaine		478070	504165	389669	500436	0.0448029		599415	633377	419600	625300	0.0457412																																499352	541706	391962	533006	0.0299605
Tyrosine																																												417350	340363	330180	248488	0.0435266
[truncated: 5 more columns]

## Sheet: Supplementary Table S2
	Metabolite		Global model		Gene-segregated												Penetrance-segregated
					BRCA1		BRCA2		PALB2		ATM		CHEK2		RAD51		High penetrance		Moderate penetrance
	Number of metabolites with FC>1,25		17		68		26		41		47		48		70		28		38
	Number of metabolites with FC<0,75		2		8		5		39		40		29		27		3		15
	(1R,9S)-10-(Cyclopropylmethyl)-12-ethyl-4-hydroxy-13-methyl-10-azatricyclo[7.3.1.02,7]trideca-2(7),3,5-trien-8-one		0.917196		1.03604		1.07683		1.40575		0.378136		1.09272		0.253667		1.08826		0.460659
	(9Z,12Z)-15-Hydroxyoctadeca-9,12-dienoic acid		1.13566		1.47642		0.913126		0.76349		2.03552		1.54543		1.62516		1.05878		1.86433
	(R)-3-Hydroxyhexanoic acid		0.90602		0.918636		0.879886		0.773484		0.763167		1.56036		0.732165		0.879558		0.961378
	[1-(3,3-Dimethyloxiran-2-yl)-3-[(8S,10S,11S,14R)-11-hydroxy-4,4,8,10,14-pentamethyl-3-oxo-1,2,5,6,7,9,11,12,15,16-decahydrocyclopenta[a]phenanthren-17-yl]butyl] acetate		1.04324		1.06339		1.02504		0.889		1.22366		0.901599		1.43728		1.02263		1.06594
	[3-(2-Aminopropyl)-6-methylidenecyclohexa-1,3-dien-1-yl]methanediol		0.973838		1.0832		0.789089		1.49431		1.2729		0.815182		0.7635		0.958011		1.01431
	[3-[2-Aminoethoxy(hydroxy)phosphoryl]oxy-2-hydroxypropyl] hexadecanoate		1.12955		1.18442		0.911417		1.24398		1.4259		1.21727		2.09109		1.02616		1.53073
	1-(2-Chloroethyl)-1-nitrosourea		1.03289		0.9779		1.16637		0.861748		1.0294		0.818245		1.1052		1.05685		0.949682
	1,2,3,4-Tetrahydroquinoline		0.883393		0.841408		0.788965		1.48496		0.876432		0.852895		0.759394		0.877473		0.876732
	1,2-Cyclohexanedicarboxylic acid		0.986011		0.85896		1.02235		1.2662		1.03959		0.897627		0.848109		0.985854		0.958146
	1,3-Benzodioxole		1.00713		1.33553		0.984159		0.633991		0.692568		0.975284		2.2527		1.03471		0.877319
	1,4-Butanediphosphonic acid		1.12828		1.4477		1.29518		0.531535		0.68991		1.28683		1.3422		1.21208		0.875367
	1-[(5-Methoxy-2,3-dihydro-1H-indol-3-yl)methylideneamino]-2-pentylguanidine		1.0345		1.08825		1.2003		1.2271		0.469089		0.55822		1.58987		1.16434		0.679164
	13-Hydroxyoctadeca-2,4-dienoic acid		0.858668		1.02335		0.651096		1.35887		1.13839		0.840109		0.654378		0.838762		0.908639
	17-Ethynyl-16-fluoroestradiol		1.0668		1.01122		0.920925		0.937614		2.56612		0.946334		2.12802		0.958077		1.66978
	1-Methyl-5-(4-benzoyl)pyrrole-2-acetic acid 2-(theophylline-7-yl)ethyl ester		1.25229		1.91922		1.14376		1.44055		0.885404		0.676189		3.46121		1.36739		0.92677
	1-Methylcyclohexane-1,2-dicarboxylic acid		1.05052		1.055		1.18721		0.824408		0.747775		0.996401		1.24153		1.08791		0.900414
	1-Naphthylamine		1.06457		1.24658		0.953025		1.14915		0.869502		1.35246		1.01724		1.06926		0.996914
	1-Palmitoyl-2-linoleoyl-rac-glycerol		1.03155		1.12673		1.0322		0.546026		1.73819		1.20476		0.957949		0.983714		1.37574
	1-Phenylethylamine		0.936182		0.799334		0.841863		1.29125		1.17788		1.93338		0.880868		0.874482		1.27924
	2-(1-Phenylpropan-2-yl)-1,3,2-dioxazetidine		0.83137		0.70482		0.914256		0.764878		1.387		0.838202		0.403778		0.833658		0.898245
	2-(2-Chlorophenyl)ethylbiguanide		1.28629		1.77318		1.37034		1.10074		0.642385		0.99585		0.928274		1.46971		0.809396
	2-(4-Hydroxy-3,5-di-tert-butylphenylthio)-hexanoic acid		0.911648		0.877461		0.570852		1.73328		2.01864		1.33962		0.900484		0.782101		1.49074
	2,2,2-Trifluoroacetophenone		1.20476		1.28729		1.30817		1.06853		0.95413		0.726391		1.19347		1.26945		0.984509
	2,2'-Azobis(4-methoxy-2,4-dimethylvaleronitrile)		0.93876		0.914221		1.02386		0.771064		0.873936		0.698484		1.35864		0.954331		0.86863
	2,4-Dodecadienamide, N-(2-methylpropyl)-, (2E,4E)-		1.03207		1.07927		1.04865		0.629161		1.54884		1.0397		1.55584		0.995638		1.41351
	2,6-Ditert-butyl-4-[3-(3,5-ditert-butyl-4-hydroxyphenoxy)propoxy]phenol		0.950074		0.951418		0.995123		0.774095		1.26562		0.541215		1.49995		0.955945		0.921464
	2-Amino-3,7,8-trimethylimidazo(4,5-f)quinoxaline		1.12398		0.86705		1.73511		1.48372		0.855379		1.84852		0.27282		1.30199		0.68055
	2-Amino-4-[carbamimidoyl(methyl)amino]butanoic acid		1.02512		0.883871		1.12928		1.47845		0.728161		1.49504		0.668575		1.08343		0.849552
	2-Amino-4-methyl-5-phosphonopent-3-enoic acid		1.04971		1.58392		0.997575		0.701094		0.587284		0.834844		1.96117		1.12657		0.799086
	2-Chloro-4-[(dimethylcarbamoyl)amino]benzoic acid		1.11881		1.17283		1.26048		0.83082		0.888366		0.855409		1.16513		1.17564		0.934726
	2-Hydrazinopyridine		1.07605		1.08605		1.06417		1.49818		1.02791		1.43134		0.552495		1.10698		0.985337
	2-hydroxymexiletine		1.05565		1.03174		0.993242		1.11087		1.10825		1.17556		1.28512		1.02548		1.13776
	2-Nitrophenyl octyl ether		1.12237		1.00503		1.31537		0.753361		1.11368		0.906536		2.00346		1.10272		1.22501
	3-Acetamidophenol		0.944126		0.905602		1.12319		0.766545		0.867067		0.593109		0.862976		0.99653		0.774658
	3-Butylphthalic acid		1.06864		1.11719		1.1671		0.842397		0.588245		4.34905		0.813913		1.10013		0.973616
	3-Formylindole		1.04948		1.29415		1.04961		0.865981		0.634695		1.01876		1.28483		1.10385		0.851816
	3-Methylhistidine		0.991129		1.37995		0.791893		1.10044		1.02724		1.35017		0.837864		0.981225		1.06567
	3-Oxalomalic acid		1.02023		0.860425		1.03602		1.09873		1.06516		1.60643		1.07274		0.978067		1.21892
	3-Pyridinemethanol, 6-amino-alpha-(((1-methyl-4-phenylbutyl)amino)methyl)-		1.04663		1.13314		1.13174		1.09576		0.79196		0.956375		0.662538		1.12625		0.796788
	4,1-Benzoxazepine		1.06097		1.31984		0.935712		0.98727		0.805631		1.60963		0.959883		1.06221		1.00182
	4,4'-Dihydrazino-biphenyl		0.912259		0.937938		0.779251		0.953437		1.26205		1.07942		0.818783		0.852246		1.06651
	4-Alanylaminoantipyrine		1.17786		1.45823		0.990992		1.33969		1.15832		1.33988		0.674273		1.19331		1.07854
	4-Aminoantipyrine		1.01053		1.05065		1.08906		0.93548		0.742919		0.891855		1.00772		1.05821		0.816524
	4-Aminophenyl phosphate		1.02359		1.29256		0.935851		0.729691		1.35296		0.600577		0.94197		1.02723		1.007
	4-Methoxy-N,N-dimethylaniline		0.827471		0.902614		0.668187		1.20484		1.04104		0.811369		0.805834		0.804604		0.923143
	5-Aminovaleric acid		1.27529		1.3435		1.41311		1.54897		1.13457		0.82685		0.520312		1.4249		0.850326
	5-Hydroxy-3-[(5-nitrofuran-2-yl)methylideneamino]-1H-imidazol-2-one		0.840033		0.881102		0.917116		0.81784		0.653498		0.952504		0.596635		0.893626		0.713485
	7-Hexadecynoic acid		0.875276		0.80178		0.776933		1.36613		1.15364		0.912822		0.783662		0.852058		0.965122
	9(10)-Epoxy-12Z-octadecenoic acid		0.99517		1.32042		1.12155		0.590085		0.65919		0.551884		0.783574		1.09935		0.688009
	9H-Purine-9-ol		0.882159		0.0500744		0.764207		0.0562659		98.3005		0.61392		0.918629		0.294758		45.0897
	Acetylcarnosine		1.31505		1.71208		1.03589		1.4751		1.45896		0.697092		3.19438		1.28234		1.50705
	Acetyl-N-formyl-5-methoxykynurenamine		1.37301		1.97886		1.09044		1.20728		1.31311		4.20952		0.208073		1.3303		1.33151
	alpha-(4-Fluorophenyl)-4-(5-fluoro-2-pyrimidinyl)-1-piperazine butanol		1.18063		1.31438		1.19963		1.07273		0.956526		1.01795		1.2394		1.22355		1.01278
	Anhydromethylecgonine		0.885783		0.791331		1.09309		0.60935		0.997763		0.67831		0.549989		0.91966		0.833032
	Benzamide, 4-chloro-N-(2-(4-morpholinyl)ethyl)-, N-oxide		1.16763		1.13392		1.05022		1.60339		1.70065		0.40142		4.45961		1.08483		1.66489
	Bergamotin		1.16233		0.948962		1.05437		1.32525		2.89779		1.27229		1.65741		1.0253		2.10361
	Beta-Guanidinopropionic acid		0.906402		0.878645		0.855715		0.581649		1.25439		1.18032		0.917298		0.825821		1.15361
	Butanedioic acid, octenyl-		0.978652		0.900491		0.945964		1.20012		1.24616		1.03455		0.77473		0.957895		1.05455
	Butyl-(2,5-dimethyl-7-(2,4,6-trimethylphenyl)-7H-pyrrolo(2,3-d)pyrimidin-4-yl)ethylamine		0.973839		0.773229		1.15626		0.825655		1.00218		0.804741		1.28615		0.970175		0.997408
	Butyryl trihexyl citrate		0.932163		0.587985		1.37259		0.477668		0.825436		1.06565		0.789195		0.964158		0.889195
	Caffeine		1.1902		1.40296		0.819217		2.43777		1.14062		1.50619		1.13144		1.20418		1.19888
	CAR 10:0		1.06778		1.18728		1.23768		0.34728		0.6598		2.69146		0.908424		1.00611		1.18953
	CAR 10:1		1.00528		1.32045		1.19675		0.358086		0.613147		1.02774		2.03717		1.04657		0.887382
	CAR 12:0		1.00852		1.16517		1.06756		0.489358		0.597049		1.642		1.20148		1.00227		0.997726
	CAR 12:1		1.06003		1.16358		1.1994		0.551922		0.78839		1.08449		1.36522		1.09667		0.982415
	CAR 14:0		1.07913		0.994284		1.01758		1.00409		1.04279		1.63437		1.32743		1.01506		1.29342
	CAR 14:0;O		1.21895		1.43974		1.33868		1.90588		0.690224		0.934949		0.457301		1.42334		0.68978
	CAR 14:1		0.990804		1.00595		1.12136		0.471224		0.557668		1.43693		1.5351		0.990611		0.985218
	CAR 14:2		0.911115		0.914454		1.00109		0.4179		0.505058		1.81454		1.12578		0.8786		0.94565
	CAR 16:0		1.0013		0.945999		0.953876		1.15003		0.892527		0.81791		1.74413		0.963384		1.10078
	CAR 16:1		0.880541		1.01796		0.804692		0.813818		0.621892		1.31393		0.905293		0.87424		0.877306
	CAR 18:1		1.05391		1.25956		1.06293		1.12301		0.817308		0.460261		1.3811		1.1313		0.813548
	CAR 18:2		1.11386		1.27124		1.09016		1.28843		0.969445		0.753078		1.03251		1.17257		0.926499
	CAR 2:0		1.1949		1.91196		1.29525		0.667372		0.465616		1.1147		1.93582		1.36278		0.74335
	CAR 3:0		1.29879		1.59558		1.17651		0.896285		1.21541		1.35514		1.60443		1.28346		1.32469
	CAR 4:0		1.36628		1.811		1.53425		0.571439		0.992297		0.878246		1.92057		1.46203		1.06432
	CAR 5:0		1.1424		1.5446		1.07603		0.521434		0.751007		1.87968		1.5626		1.12772		1.09227
	CAR 5:0;O		1.31329		1.21178		1.24973		1.66264		1.04947		1.4295		1.59013		1.29704		1.2064
	CAR 6:0		0.987685		1.62617		1.29242		0.274359		0.45236		1.92696		1.03315		1.03528		0.827102
	CAR 8:0		1.08253		1.28874		1.2073		0.315543		0.691577		2.93651		0.794459		0.980212		1.25721
	CAR 8:1		1.02311		1.08748		1.27358		0.715364		0.746662		0.794771		0.616428		1.13153		0.706367
	CAR 9:0		1.14679		1.42311		1.16676		1.02359		0.755425		1.14038		1.3078		1.23104		0.902397
	CAR14:1;OH		1.07593		0.98452		1.27178		2.34807		0.661669		0.688992		0.501237		1.24468		0.644756
	Carnitine		1.39399		1.86136		1.20835		0.568571		1.32637		1.41718		4.52206		1.31936		1.80366
	Cortisol		0.981399		1.12317		0.843898		0.839109		1.23954		1.26232		1.50347		0.939602		1.25902
	Creatine		1.16269		1.18935		1.08814		0.836698		1.67587		1.23804		0.90913		1.0919		1.33227
	Cyclo(-Leu-Pro)		1.20182		1.37953		1.10293		1.05771		1.58371		0.825713		1.28669		1.19158		1.26781
	Cytosine-5-carboxylic acid		1.15778		1.13997		1.05497		1.18692		1.58165		1.08315		1.76258		1.09495		1.47909
	Dansylsarcosine		1.33281		1.78656		1.21648		1.53933		1.01175		0.958363		1.07684		1.43304		1.00163
	Dihydro-.beta.-erythroidine		0.893947		0.990738		0.73195		1.35166		0.992011		0.796274		1.10344		0.886943		0.960659
	Dihydroxyeicosatetraenoic acid		0.903267		0.976657		0.760747		1.4725		1.34526		0.668636		0.75212		0.897155		0.930705
	Diisopropylethylamine		1.47088		1.15534		2.08465		0.889163		0.89473		0.854932		1.71765		1.63567		0.982844
	DL-Indole-3-lactic acid A		1.08877		1.30233		1.05511		1.1135		0.811338		0.858963		1.6098		1.12724		0.943218
	DL-Indole-3-lactic acid B		1.26222		1.42046		1.3583		1.13407		1.01786		0.784748		1.39521		1.35351		0.960834
	DL-Valine-4-antipyrineamide		1.14793		1.47571		1.00465		0.942756		1.2682		0.855455		1.60804		1.14974		1.12778
	DMAP-ethyl-PAF		1.0492		1.09452		1.00829		0.840287		1.58993		0.788906		1.57662		1.01462		1.13619
	D-Valine, methyl ester		1.22107		1.66325		1.22252		0.844976		0.808811		0.919462		2.44864		1.30036		0.961769
	Erythrulose		1.15848		0.850272		1.63769		1.31903		0.476329		1.39115		1.19369		1.28629		0.793371
	Ethyl 2-[2-(diethylamino)ethoxy]-1-phenylcyclopentane-1-carboxylate		1.11271		0.992792		1.44609		0.359464		2.51061		0.979167		4.76644		1.05168		2.46186
	Fluoro-beta-alanine		0.861347		0.973929		0.881687		1.68929		0.465577		1.08054		0.356701		0.969376		0.552286
	Glycerol 1,2-dimethacrylate		1.11155		1.27407		1.07649		0.847306		0.729491		1.12261		1.77269		1.11007		1.03375
	Glycodeoxycholic acid		0.922729		1.30336		0.801262		0.99865		0.961978		0.482104		2.1117		0.960938		0.750586
	Glycohyocholic acid		1.12153		1.44091		1.27941		0.445656		0.974611		0.914511		2.23908		1.17979		0.961707
	Guanidinosuccinic acid		1.19759		1.8064		1.12809		0.514678		1.22163		1.13927		1.10489		1.18603		1.19531
	Hypoxanthine		0.712317		0.367239		0.882715		0.468743		2.99147		0.636688		0.790694		0.548806		2.11409
	Indole		1.04682		1.35121		1.0229		0.771382		0.846726		0.645227		1.78105		1.09602		0.871475
	L-Isopulegol		0.885989		0.68194		1.10517		0.600639		0.881541		1.03205		0.678292		0.889537		0.881997
	LPC 14:0		1.11091		1.16933		1.19597		0.913913		1.00421		1.13966		0.785136		1.15368		1.01944
	LPC 15:0		1.0207		1.2905		0.851231		1.22583		0.854868		1.32889		1.16344		1.01565		1.04034
	LPC 16:0 A		1.10418		1.13115		1.05773		0.977913		1.28411		1.01476		1.47338		1.07057		1.25314
	LPC 16:0 B		1.09447		1.16598		1.03625		0.992937		1.02741		0.957013		2.00275		1.07044		1.28474
	LPC 16:1		0.979742		1.1565		0.840104		1.27566		0.822096		1.36274		1.06076		0.977785		1.04566
	LPC 17:0		1.07869		1.12628		0.870082		1.1366		1.35752		1.23156		1.91832		0.984065		1.35496
	LPC 18:0 A		1.02598		1.14587		0.938486		1.08418		1.32622		0.86765		0.79352		1.02129		1.09937
	LPC 18:0 B		1.04016		1.23325		0.894767		1.16493		1.17401		1.13884		1.10589		1.01695		1.14364
	LPC 18:1 A		1.05807		1.67249		0.91342		1.01598		0.822529		0.728762		0.886569		1.13761		0.823583
	LPC 18:1 B		1.06227		1.10054		1.01657		1.08782		1.3659		0.917961		1.19898		1.04745		1.18696
	LPC 18:1 C		1.11839		1.56396		0.961061		0.732634		1.3656		1.48413		1.28526		1.09252		1.40288
	LPC 18:2 A		1.04108		1.32009		0.849538		1.47176		1.14132		0.92042		1.52791		1.04321		1.10527
	LPC 18:2 B		0.866236		0.946827		0.850167		1.08537		0.637403		0.852101		1.23576		0.89756		0.800684
	LPC 18:3		1.09662		1.19124		1.10673		0.914238		1.07237		0.797655		1.21762		1.11277		1.06451
	LPC 18:4		0.966143		1.13052		0.966699		1.18441		0.492182		0.817029		1.20191		1.02921		0.792355
	LPC 20:2		1.02785		1.26274		0.870913		1.35926		1.165		0.68236		1.45649		1.04065		1.06947
	LPC 20:5		1.04965		1.33134		0.94722		0.98445		0.703441		1.50849		1.36576		1.06631		0.997349
	LPC 22:4		0.934332		1.31677		0.872158		1.59442		0.564613		0.442409		0.609272		1.05854		0.573208
	LPC 22:6 B		1.03385		1.25448		1.0452		1.22872		0.678479		0.900377		0.79163		1.12203		0.769983
	LPC O-16:0 A		0.8964		0.996774		0.800202		0.822613		1.14571		1.08608		1.0195		0.868545		1.13294
	LPC O-16:0 B		1.08571		1.27745		0.926081		1.15742		1.27783		0.752639		1.64855		1.06042		1.15843
	LPC P-16:0		1.02467		1.15324		0.939579		0.972442		1.09132		0.947225		1.13013		1.01323		1.07148
	LPE 18:0		1.03061		1.29883		0.994322		1.33654		0.71268		0.79107		0.574548		1.13281		0.729049
	LPE 19:0		1.11046		1.26347		0.983003		1.15325		1.0917		1.29162		1.21311		1.09439		1.18836
	L-Phenylalanine, methyl ester		1.2354		1.37552		1.35871		0.936722		1.04802		0.899607		1.08653		1.3095		0.983352
	LysoPC(22:5(4Z,7Z,10Z,13Z,16Z)/0:0)		0.94445		1.05218		0.94119		0.821855		1.01429		0.854275		0.746232		0.958053		0.917856
	Metaldehyde		1.0733		1.19727		1.11524		1.04285		0.757612		1.19243		0.771158		1.13237		0.872532
	Methyl 6,7-dimethoxy-4-ethyl-beta-carboline-3-carboxylate		1.0754		1.13668		0.769475		1.5202		1.301		2.86243		1.57971		0.982878		1.68195
	Myristoleic acid		0.930462		1.01357		0.760383		1.78309		1.28122		0.816467		0.708357		0.925724		0.936135
	N-(2-Hydroxyethyl)valine		1.15113		1.35956		1.07745		0.840317		0.911164		1.96		1.1512		1.13231		1.22768
	N,N-Diethyl-6-methyl-[1,2,4]triazolo[1,5-a]pyrimidin-5-amine		1.22032		1.08459		1.75861		1.85068		0.912896		1.78253		0.318471		1.39235		0.778538
	N6-Methyladenosine		0.878468		1.18225		0.902579		0.450552		0.613971		0.60366		1.3683		0.917698		0.770809
	N-Lactoylleucine		1.20672		1.9448		1.11861		0.789576		0.658438		1.0747		1.4019		1.29996		0.910115
	Octopamine		1.01308		1.32576		0.971667		0.901642		0.771063		1.04185		0.664279		1.07154		0.810927
	Palmitoyl-EA		1.17518		0.804728		1.59915		0.727349		1.80343		0.936632		1.01921		1.2123		1.27297
	Paraxanthine		1.09774		1.01162		1.16058		1.15306		0.898265		0.695119		2.1453		1.12273		0.978095
	PC 28:1 (PC 14:0_14:1)		1.0193		1.2646		1.04237		0.549221		1.12848		1.20217		1.26065		1.02681		1.15529
	PC 32:1 (PC 14:0_18:1)		1.02161		1.21111		0.927969		0.685452		1.41998		1.09523		1.37797		0.983606		1.27669
	PC O-18:0 (PC O-16:0/2:0) - PAF		1.21577		1.40306		1.13384		1.19855		1.6788		0.637113		1.89563		1.22035		1.18215
	PC(P-18:1(11Z)/14:1(9Z))		0.884445		0.863278		0.861135		0.659555		1.45617		0.756686		1.5084		0.837139		1.14439
	PC(P-18:1(11Z)/20:5(5Z,8Z,11Z,14Z,17Z))		0.971099		0.958937		0.864151		0.869664		1.67875		0.809742		1.69765		0.898898		1.29272
	PG 34:1 (PG 16:1_18:0)		0.974515		0.91394		0.655085		1.0609		3.74405		1.38091		4.0389		0.789353		2.59045
	PG 36:5 (PG 18:2_18:3)		1.01773		1.23121		0.774098		1.10957		1.80175		0.558678		2.08111		0.959432		1.25388
	Phenylalanine		1.20194		1.41705		1.18588		1.10701		0.995082		0.991456		1.23032		1.25519		0.999111
	Phenyl-Alanine		1.96681		4.80679		1.60288		0.520434		1.92659		4.26235		1.10509		1.95717		2.10666
	Phenylethylmalonamide		1.24		1.37117		1.43794		1.19175		0.653972		1.03162		1.45673		1.37578		0.84948
	Pro-Gly		1.49933		0.68909		1.30265		0.827718		5.23528		6.75541		0.931331		1.05646		3.96075
	Pro-hydroxyPro		0.852504		0.784403		0.865341		0.686897		1.29163		0.714913		1.95201		0.814236		1.26461
	Proline		1.31175		1.57249		1.35611		1.4711		0.996504		0.994673		1.07508		1.41985		0.976951
	Tetradecyl nicotinate		1.05543		1.01836		1.09303		0.480289		2.1977		1.28924		3.19923		0.961002		2.04005
	tetrahydroxybutylimidazole		0.64446		0.553486		0.760347		2.20599		0		1.09079		0.249681		0.734536		0.358218
	Theobromine		0.949751		1.1557		0.875946		1.54509		1.03864		0.230934		0.991356		1.05127		0.655892
	trans-4-Aminocyclohexanecarboxylic acid		1.29461		2.02036		1.18269		0.34901		1.25647		2.47293		1.54265		1.2434		1.51223
	trichloroethyl		0.918769		0.762899		1.01872		1.16427		1.22331		0.503265		0.804175		0.913903		0.86682
	Triethylene glycol dimethacrylate		1.3026		1.46646		1.12612		1.48444		1.69655		1.2865		1.05723		1.28164		1.40595
	Trimethylolmelamine		0.885756		0.70204		1.21603		1.72225		0.517882		1.7341		0.206538		1.00926		0.532397
	Tryptophan		1.04535		1.38725		0.886327		1.02139		0.787367		1.49386		0.939735		1.05039		0.984257
	Tryptophan betaine		1.22686		1.42854		1.20207		1.54662		1.09607		0.705145		2.27465		1.27398		1.09634
	Tyrosine		1.13454		1.5256		1.16943		1.00895		0.690556		0.905784		0.868815		1.26401		0.76291
	Tyrosol		1.16533		1.3156		1.1724		1.00727		0.901475		1.14332		1.18116		1.19773		0.998044
	Uric acid		0.992438		0.955775		1.03008		0.995916		0.791918		1.93933		0.710458		0.991788		0.991717
	Valine		1.05516		1.01915		1.14144		0.706109		0.980517		1.06448		1.55334		1.03634		1.11953
											0
											,
